# Supplementary material for: Achieving adjustable digital-to-analog conversion in memristors with embedded Cs2AgSbBr6 nanoparticles
Source: Royal Society of Chemistry journal article supplement (doi:10.1039/d2nr06370k), 2023-01-01
Supplement: d2nr06370k1.pdf [file d2nr06370k1.pdf]

# Achieving Adjustable Digital-to-Analog Conversion in Memristors with Embedded Cs<sub>2</sub>AgSbBr<sub>6</sub> Nanoparticles

## Supplementary Material

Yuchan Wang <sup>a,‡,\*</sup>, Nannan Xu <sup>a,‡</sup>, Yiming Yuan <sup>a</sup>, Wenxia Zhang<sup>a,\*</sup>, Qiang Huang <sup>a</sup>,

Xiaosheng Tang <sup>a</sup> and Fei Qi <sup>a,\*</sup>

<sup>a</sup>Optoelectronic Engineering, Chongqing University of Posts and Telecommunications, Chongqing 400065, China, [yuchanwang87@163.com](mailto:yuchanwang87@163.com), [zhangwx@cqupt.edu.cn](mailto:zhangwx@cqupt.edu.cn), [qifei@cqupt.edu.cn](mailto:qifei@cqupt.edu.cn)

<sup>‡</sup>These authors contributed equally to this paper.

**KEYWORDS:** lead-free double perovskites, nanoparticles, resistive switching memories, memristors, conductive filaments

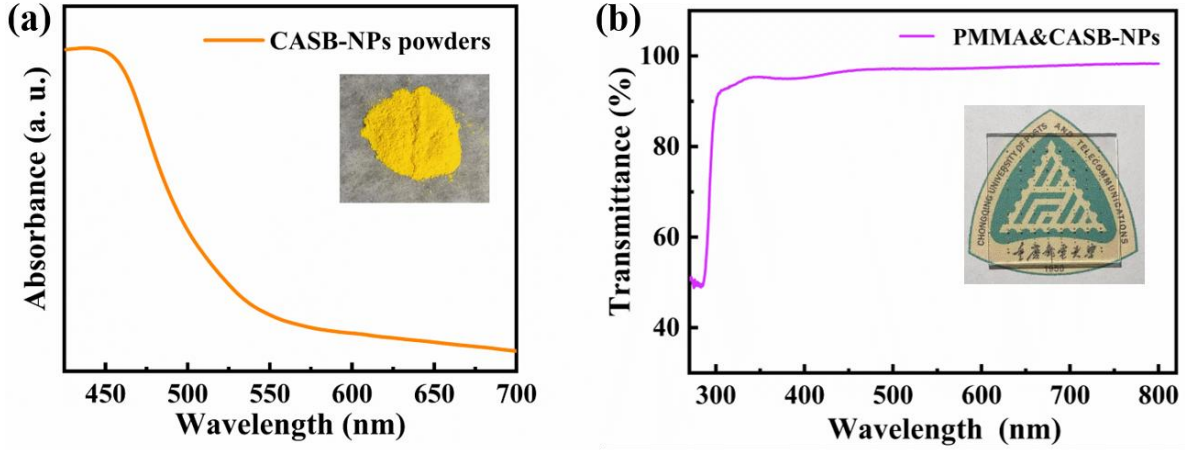

**Fig. S1** (a) The absorption spectra of  $\text{Cs}_2\text{AgSbBr}_6$ -NPs powders, the inset shows the optical image of the powders. (b) The transmission spectra of PMMA& $\text{Cs}_2\text{AgSbBr}_6$ -NPs film, the inset shows the optical image of the transparent  $\text{Cs}_2\text{AgSbBr}_6$ -NPs memristor device.

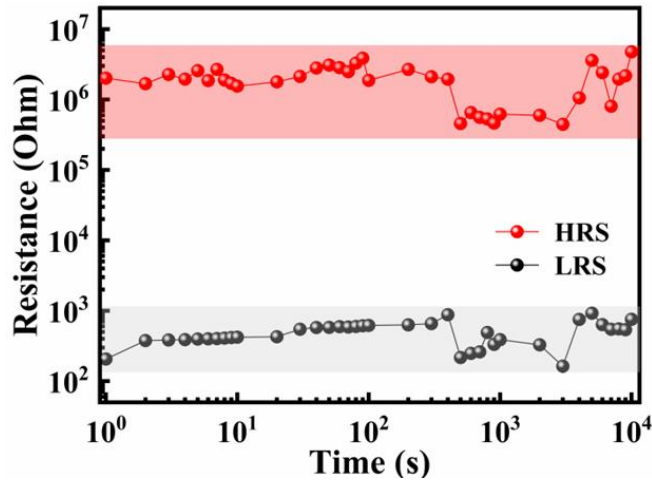

**Fig. S2** The retention ability of Ag/PMMA& $\text{Cs}_2\text{AgSbBr}_6$ -NPs (5%)/ITO devices, the reading voltage is 0.1 V.

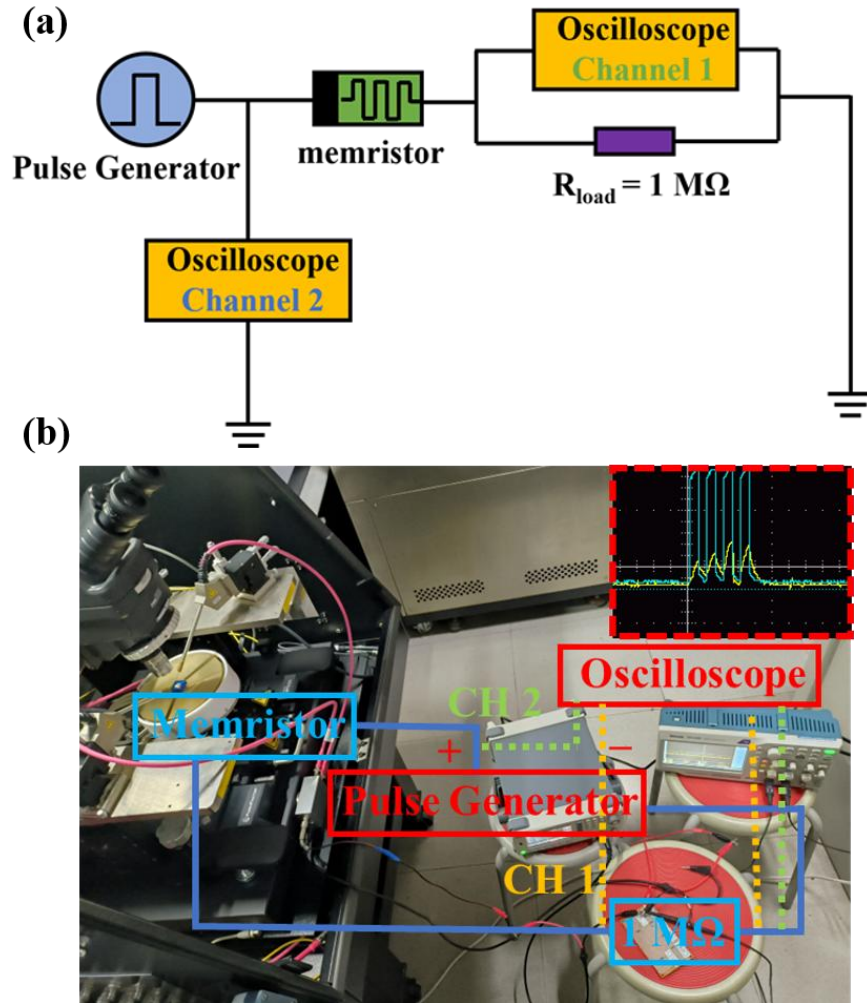

**Fig. S3** (a) Schematic diagram of the artificial synaptic behavior measurement circuit. (b) The actual diagram of the test setup, the inset exhibits the waveform plot of artificial synapse measured from the oscilloscope.

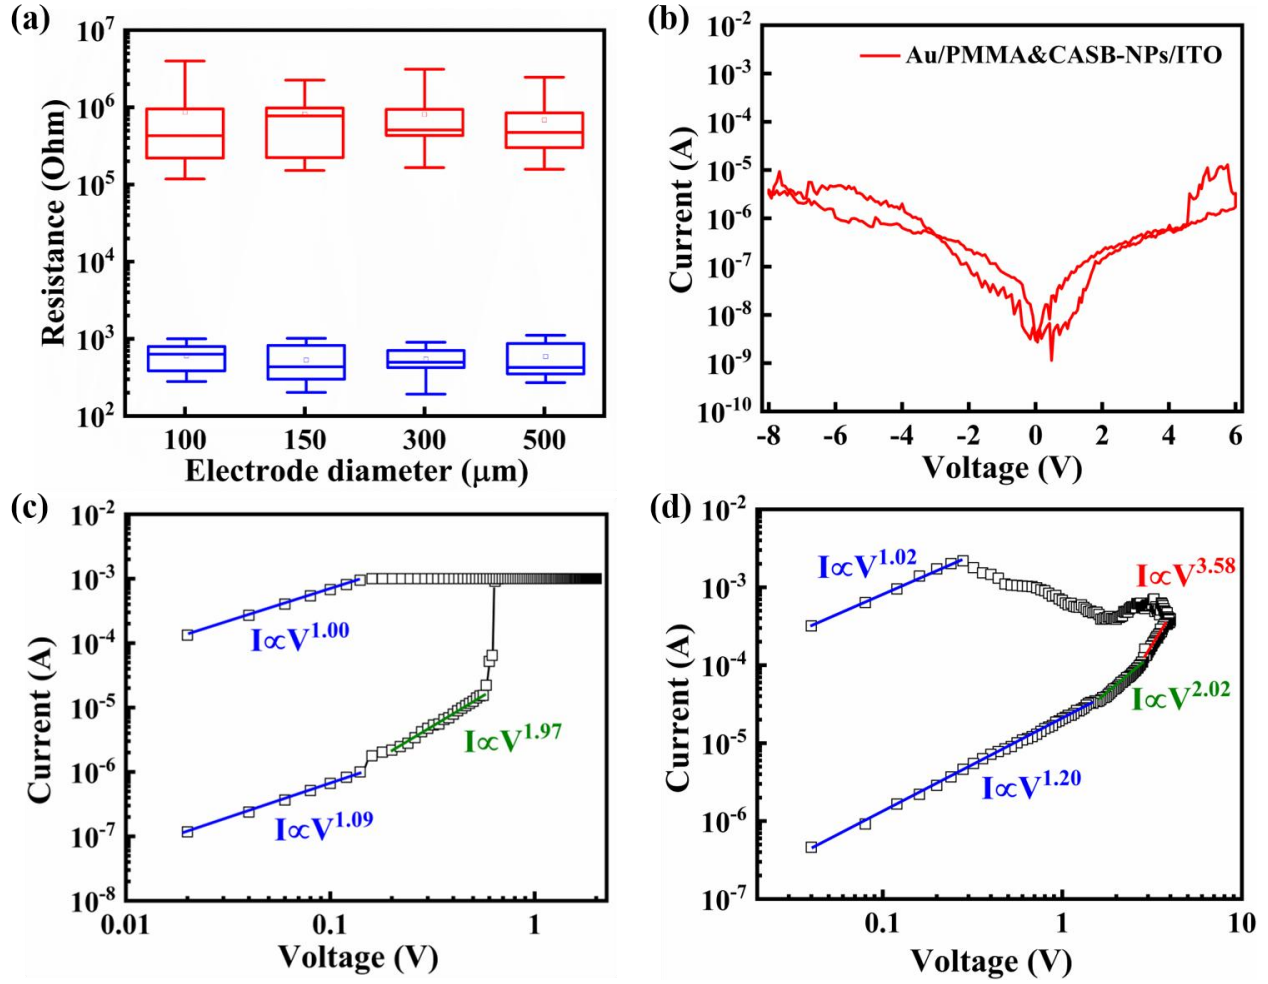

**Fig. S4** (a) The dependence of the resistance states on the area of top Ag electrodes. (b) The I-V curve of the Au/PMMA&Cs<sub>2</sub>AgSbBr<sub>6</sub>-NPs/ITO memristor device. The fitting lines of typical I-V curve with log-log scale during (c) the positive bias-voltage and (d) the negative bias-voltage.

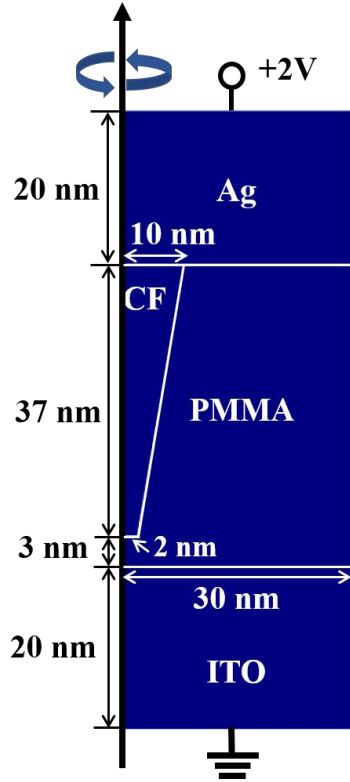

**Fig. S5** The 2D axisymmetric model of the memristor in the simulation software. The  $\text{Cs}_2\text{AgSbBr}_6$ -NPs are spheres with a diameter of 3 nm which are homogeneously added in the PMMA layer.

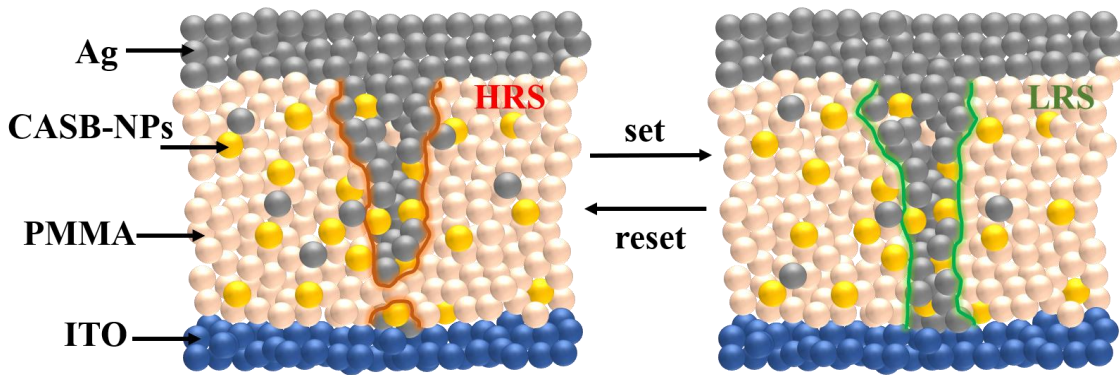

**Fig. S6** Schematic diagram of the formation and rupture of Ag-conducting filaments.

**Table S1.** Comparison of the Ag/PMMA&Cs<sub>2</sub>AgSbBr<sub>6</sub>-NPs/ITO memristor with previously reported memristors. (\* indicates that the data is read from the graph)

| Structures                                                  | Type               | Reset/Set voltage (V) | Endurance cycles | Retention time (s) | PPF index       | Ref       |
|-------------------------------------------------------------|--------------------|-----------------------|------------------|--------------------|-----------------|-----------|
| Ag/PMMA/AgBiI <sub>4</sub> //ITO                            | Digital            | -0.16/+0.16 V         | 700              | 10 <sup>4</sup>    | --              | 1         |
| Al/CsBi <sub>3</sub> I <sub>10</sub> /ITO                   | Digital            | -1.7/+0.9 V           | 150              | 10 <sup>4</sup>    | --              | 2         |
| Ag/PMMA/Cs <sub>3</sub> Cu <sub>2</sub> I <sub>5</sub> /ITO | Digital            | -0.44/+0.60 V         | 100              | 10 <sup>4</sup>    | --              | 3         |
| Ag/CsSnCl <sub>3</sub> /ITO                                 | Digital and Analog | -1.07/+0.95 V         | 10 <sup>5</sup>  | 10 <sup>4</sup>    | 12%*, Δt=10 μs  | 4         |
| Ag/PMMA/Cs <sub>2</sub> AgBiBr <sub>6</sub> /ITO            | Digital and Analog | -0.5/+0.5 V           | 110              | 10 <sup>3</sup>    | 30%, Δt=0.2 ms  | 5         |
| Au/CsCu <sub>2</sub> I <sub>3</sub> /ITO                    | Analog             | +0.2/-1.2 V           | --               | --                 | 52%*, Δt=10 ms  | 6         |
| Ag/PMMA&Cs <sub>2</sub> AgSbBr <sub>6</sub> -NPs/ITO        | Digital and Analog | -0.42/+0.67 V         | 900              | 10 <sup>4</sup>    | 25.7%, Δt=10 μs | This work |

1. H. B. Ye, B. Sun, Z. Y. Wang, Z. Y. Liu, X. N. Zhang, X. H. Tan, T. L. Shi, Z. R. Tang and G. L. Liao, *JOURNAL OF MATERIALS CHEMISTRY C*, 2020, **8**, 14155-14163.
2. Z. Xiong, W. Hu, Y. She, Q. Q. Lin, L. J. Hu, X. S. Tang and K. Sun, *ACS APPLIED MATERIALS & INTERFACES*, 2019, **11**, 30037-30044.
3. F. J. Zeng, Y. Y. Guo, W. Hu, Y. Q. Tan, X. M. Zhang, J. L. Feng and X. S. Tang, *ACS APPLIED MATERIALS & INTERFACES*, 2020, **12**, 23094-23101.
4. A. Siddik, P. K. Haldar, T. Paul, U. Das, A. Barman, A. Roy and P. K. Sarkar, *NANOSCALE*, 2021, **13**, 8864-8874.
5. J. Lao, W. Xu, C. L. Jiang, N. Zhong, B. B. Tian, H. C. Lin, C. H. Luo, J. Travas-sejdic, H. Peng and C. G. Duan, *JOURNAL OF MATERIALS CHEMISTRY C*, 2021, **9**, 5706-5712.
6. K. J. Kwak, J. H. Baek, D. E. Lee, I. h. Im, J. Kim, S. J. Kim, Y. J. Lee, J. Y. Kim and H. W. Jang, *Nano Letters*, 2022, **22**, 6010-6017.
